# Supplementary material for: Structural aspects of nucleotide ligand binding by a bacterial 2H phosphoesterase
Source: PubMed Central journal article supplement (PMC5283653; doi:10.1371/journal.pone.0170355), 2017-01-31
Supplement: pone.0170355.s002.pdf [file pone.0170355.s002.pdf]

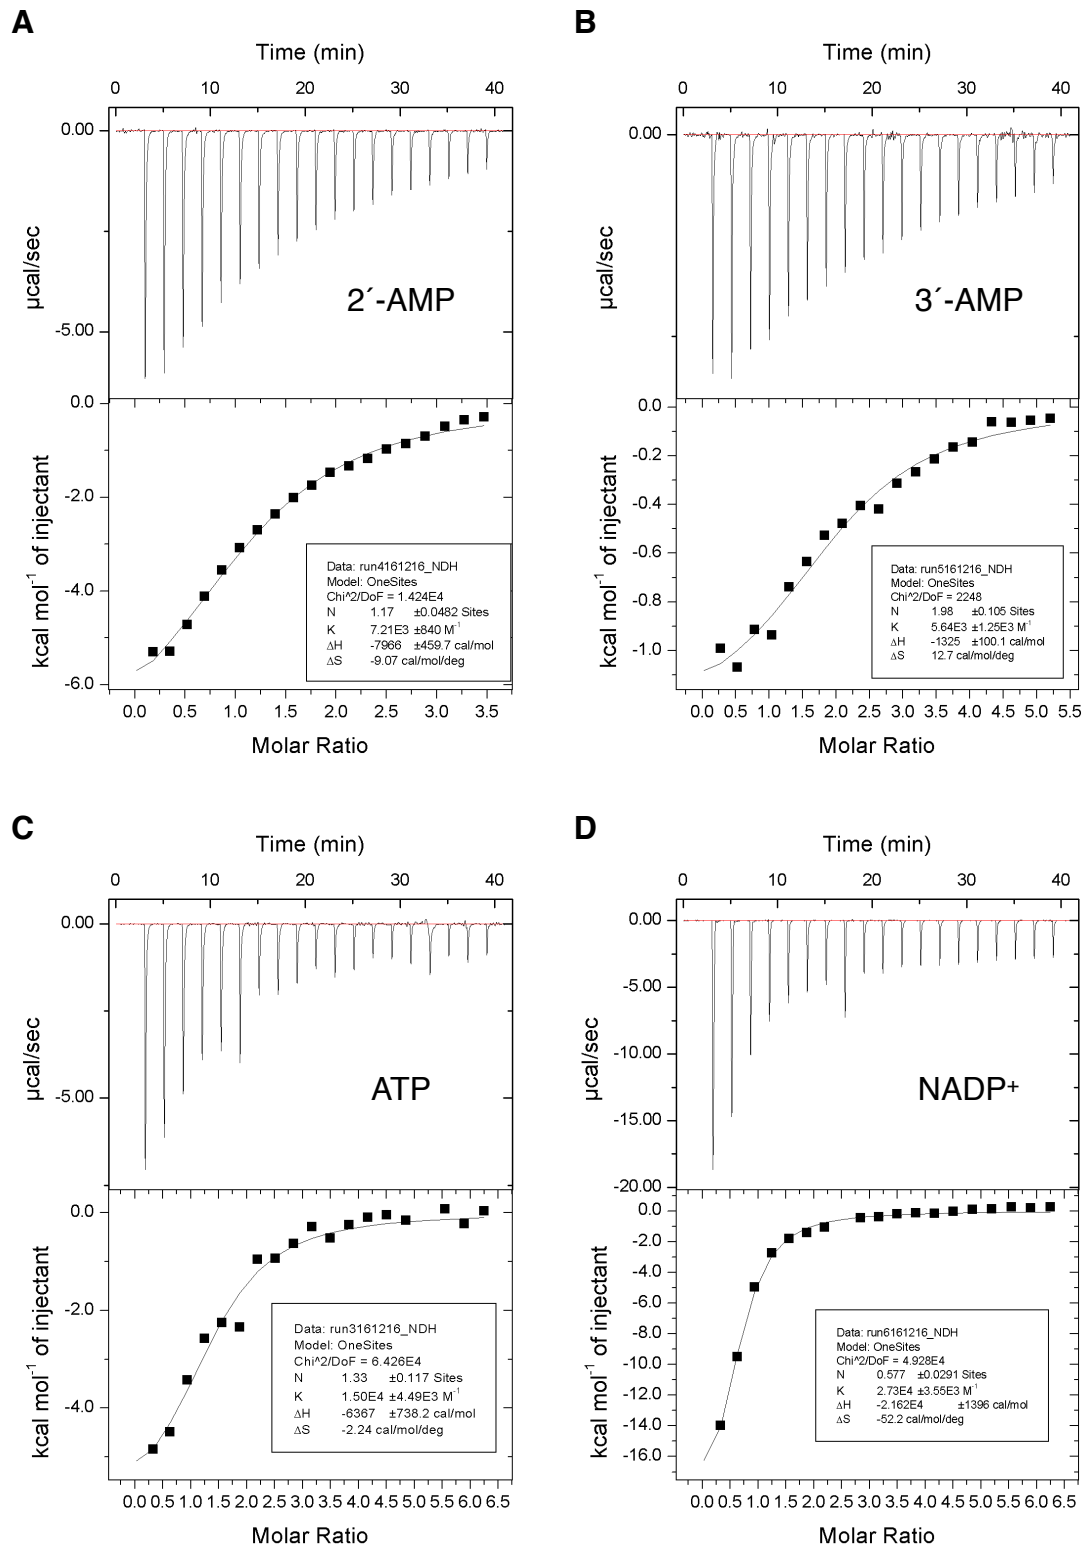

Supplementary Figure 1. Calorimetric binding assays for LigT and 2'-AMP (A), 3'-AMP (B), ATP (C), and NADP<sup>+</sup> (D).
